# Supplementary material
Source: publisher figshare collection journal article supplement (https://diabetesjournals.figshare.com/ndownloader/files/39063620)
Supplement: Supplementary file 1 [file 39063620]

**Supplementary Material**

**Research Design and Methods**

*Study sample and design*

Of the newborns included in the TEDDY study 11% were siblings or offspring of an individual with T1D.

We excluded children who were HLA ineligible i.e., confirmatory HLA-genotyping at 9 months of age was different from the initial HLA-screening (N=120), IA indeterminate (N=54), had no Illumina ImmunoChip data (N=727), or no food record data (N=5) (**Supplementary Figure 1**). Those enrolled were followed prospectively to 15 years of age, with study visits beginning at 3 months of age. In a post-hoc sensitivity analysis the 1288 Transglutaminase antibody positive (TGA) positive were excluded/censored.

For all study participants, written informed consents were obtained from a parent or primary caretaker, separately for genetic screening and participation in the prospective follow-up.

*Assessment of iron intake*

Information on iron intake from the diet including dietary supplements and fortified foods was obtained at 6m, 9m, 12m, 18m, 24m, 30m, and 36m of age and analyzed using country-specific food composition databases (FCDB) in Finland, Germany, Sweden, and the U.S. with respective in-house calculation programs(1). FCDB were harmonized at nutrient intake level. The atomic absorption spectrometry (AAS) method was used for analyzing iron content of foods in all national food composition databases(2).

*Assessment of persistent islet autoantibodies and type 1 diabetes*

IA was measured at each of the two TEDDY reference laboratories using radioligand binding assays(3). The date of persistent IA was defined as the first draw date of two consecutive samples confirmed positive for a specific autoantibody. In addition to any IA, we also investigated IAAs only (IAA-first) or GADAs only (GADA-first) as first appearing autoantibody.

Due to low numbers (≤ 15 cases) of IA-2A only (IA-2A-first) and Zinc Transporter 8 autoantibodies (ZnT8A) only (ZnT8A-first) we did not have enough power to look at these first appearing autoantibodies individually(4).

T1D diagnosis was based on the American Diabetes Association (ADA) criteria.

*Genotyping and polygenic risk score*

The genetic risk score (GRS) was constructed in the following manner: *HFE (*rs1800562-A allele) + *HFE* (rs1799945-G allele) + *TMPRSS6* (rs855791-G allele). The SNPs in the GRS have all been associated with increased circulating iron concentration, ferritin concentration, and transferrin saturation in adults(5), as no previous GWAS of iron parameters in children have been conducted. The GRS is an integer variable representing the number of risk alleles ranging from 0–4 (no subjects had above 4 risk alleles), but categorization was made as follows: (i) 0 risk alleles; (ii) 1 risk allele; and (iii) ≥ 2 risk alleles, due to increasing low numbers in categories with more than 2 risk alleles. Only 827 out of 7714 subjects with SNPs data had more than 2 risk alleles.

In addition to the GRS, we selected *a priori* SNPs, on the Illumina ImmunoChip, located in iron metabolism genes (**Supplementary Table 1).**

ImmunoChip SNPs that were within 250 kb up/downstream regions of the selected iron metabolism genes were also selected. SNPs with a minor allele frequency (MAF) below 4% for the TEDDY cohort were excluded from our analyses (**Supplementary Table 6**).

*Statistical analyses*

Descriptive data of the study population were expressed as the median and interquartile range (Q1-Q3) for continuous variables, and frequency and percentage of the total for categorical variables.

Cause-specific Cox regression models were used to analyze the effect of intake of iron on the competing risk of IAA-first and GADA-first.

The energy-adjusted intake of iron for the first three years was coded as a time-dependent covariate in the Cox regression, i.e., allowing iron intake to vary during the first 3 years of life. Iron intake after three years was held fixed and carried forward up to seroconversion or until the end of follow-up in the first 10 years of life (censoring), as our main hypothesis was that iron exposure during the first 3 years of life was the trigger of loss of tolerance. In the progression from IA to T1D analysis, energy-adjusted intake of iron at the visit of seroconversion to IA or at the visit of 3 years’ food record collection (if seroconversion of IA was after 3 years of age) was a covariate in the Cox regression.

When testing for a non-linear association between iron intake and our primary outcomes Cox regression with smoothing splines was used (6)

The interaction effect of each selected SNP involved in iron homeostasis pathways and iron intake was examined individually by including an interaction-term between the energy-adjusted iron intake and the SNP in the Cox regression models with IA, IAA-first, GADA-first, and progression to T1D as the outcome. Interaction between iron intake, and energy-adjusted vitamin C (ascorbic acid) intake on the outcomes was examined in a similar way, as vitamin C may, to some degree, enhance non-heme iron absorption(7).

*A priori*, we adjusted for known risk factors for the outcomes in the Cox regression. Specifically, the following factors were included as covariates in the Cox regression of IA, IAA-first and GADA-first: HLA-genotype (DR3/4 or non DR3/4), first-degree relative status (yes or no), sex (female or male), country (US, Finland, Germany or Sweden) and ancestry (first two principal components PC1 and PC2 calculated from the TEDDY Illumina ImmunoChip data)(8). In the Cox regression of progression to T1D, the following factors were included as covariates: age at seroconversion of IA, type of first appearing autoantibody (IAA-first, GADA-first or multiple autoantibodies), HLA-genotype (DR3/4 or non DR3/4), first-degree relative status (yes or no), sex (female or male), country (US, Finland, Germany or Sweden), PC1 and PC2. Other environmental factors associated with the outcome, but not with iron intake in the TEDDY study such as breastfeeding was not included in our models. We conducted a sensitivity analysis to exclude the potential impact of TGA+ subjects. i.e., censored all TGA+ subjects at the time of the first sample with TGA+.

To correct for multiple hypothesis testing on interaction with SNPs, the q-values based on the false discovery rate were calculated using the R package “qvalue”(9).

**Supplementary Figure 1**

Flow chart of the TEDDY cohort

**
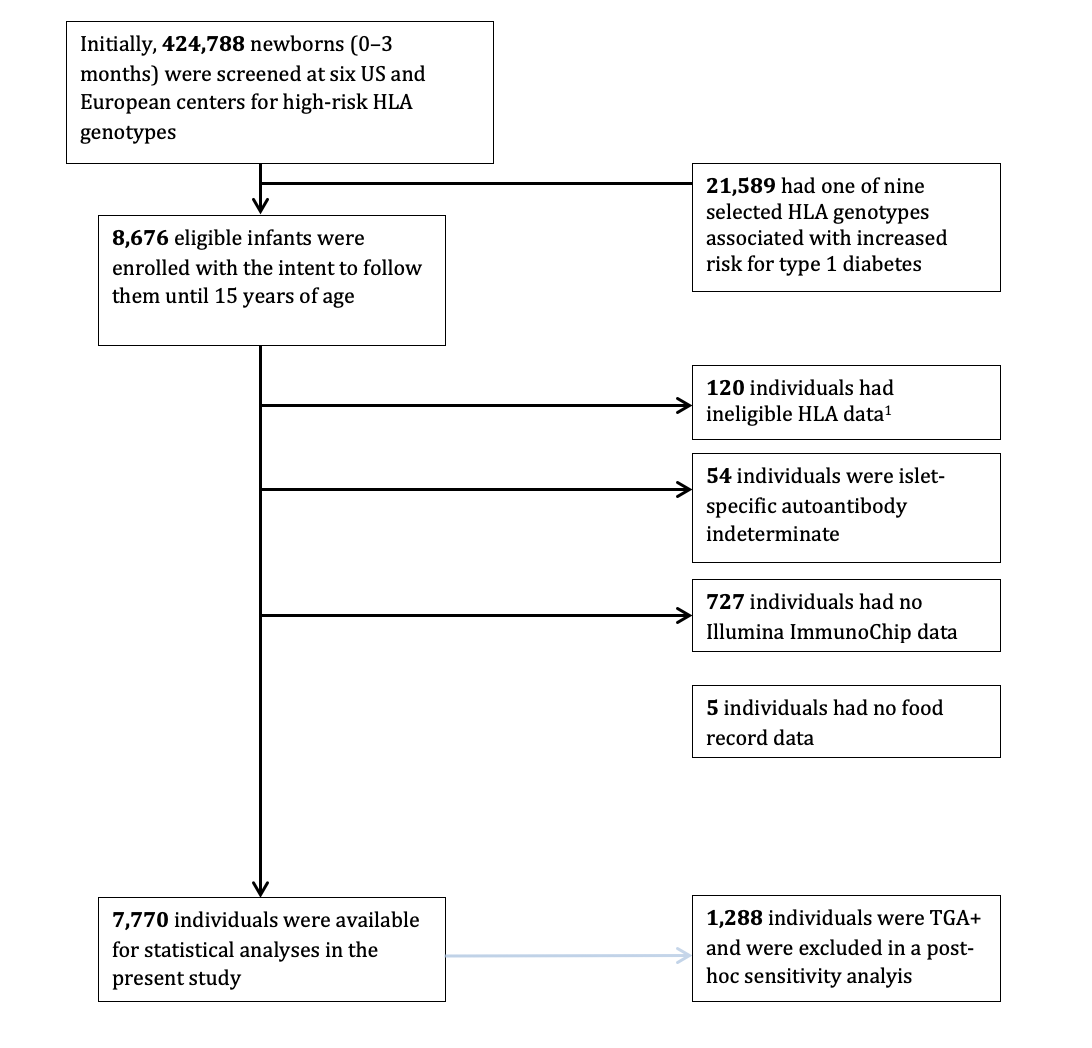
**

1 Confirmatory HLA-genotyping at 9 months of age were different from the initial HLA-screening

**Supplementary Table 1**

Selected single nucleotide polymorphisms in the genes associated with iron homeostasis on the Illumina ImmunoChip

| **Consequence** | | | **rs ID** | **Chr** | **Position (GRCh37)** | **T1D P-value** | **Minor** | **Major** | **Rank*** | **Iron trait** |
| --- | --- | --- | --- | --- | --- | --- | --- | --- | --- | --- |
| **Homeostatic iron regulator (*HFE*): Binds to transferrin receptor** | | | | | | | | | | |
| Missense Variant | | | rs1800562 | 6 | 26093141 |  | **A** | G | 2b | Increased iron, ferritin, transferrin saturation |
| Intronic splice mutation | | | rs2071303 | 6 | 26091336 |  | **C** | T | 5 | Increased iron, ferritin, transferrin saturation |
| 3 Prime UTR Variant | | | rs17596719 | 6 | 26097194 |  | **A** | G | 5 | Increases ferritin levels within the normal range |
| Missense Variant | | | rs1799945 | 6 | 26091179 |  | **G** | C | 4 | Increased iron, ferritin, transferrin saturation |
| **Transferrin (*TF*): Iron transport** | | | |  |  |  |  |  |  |  |
| Missense Variant | | | rs1799852 | 3 | 133475722 | 8.17E-03 | **T** | C | 4 | Increases transferrin saturation |
| **Ferroportin (SLC40A1): iron export** | | | |  |  |  |  |  |  |  |
| 5 Prime UTR Variant | | | rs11568351 | 2 | 190445194 |  | **C** | G | 4 | Increases Iron, Ferritin, Trf-saturation Levels |
|  |  | **Solute carrier family 39 member 14 (*SLC39A14*): Divalent metal transport** | | | | | | | | |
| Synonymous | | | rs6558052 | 8 | 22273687 |  | C | T | 3a | Unknown |
| Intron | | | rs7833266 | 8 | 22288995 |  | G | A | 5 | Unknown |
|  |  | **Bone Morphogenetic Protein 6 (*BMP6*): regulates hepcidin** | | | | | | | |  |
| Intron | | | rs17673852 | 6 | 7763858 | 5.87E-04 | G | A | 5 | Unknown |
| Intron | | | rs1358893 | 6 | 7786413 |  | T | C | 4 | Unknown |
| Intron | | | rs9379137 | 6 | 7788602 |  | G | A | 5 | Unknown |
| Intron | | | rs911752 | 6 | 7793305 |  | A | G | 7 | Unknown |
|  |  | **Transferrin receptor 2 (*TFR2*): Receptor mediated iron uptake** | | | | | | | | |
| Intron | | | rs7385804 | 7 | 100235970 |  | **A** | C | 6 | Increases Transferrin Saturation |
|  |  | **Transferrin receptor 1 (*TFRC*): Receptor mediated iron uptake** | | | | | | | | |
| n | | | rs12487782 | 3 | 195600227 |  | C | T | 4 | Downstream variant TFRC (<250 kb) |
| Intron | | | rs406271 | 3 | 195776976 |  | C | T | 5 | Unknown |
| Intron | | | rs9859260 | 3 | 195800547 |  | **C** | T | 4 | Increases mean corpuscular volume |
|  |  | **Transmembrane serine protease 6 (*TMPRSS6*): Regulates hepcidin** | | | | | | | | |
|  | | | rs738149 | 22 | 37330249 |  | C,G,T | A | 4 | Downstream variant TMPRSS6 (<250 kb) |
| Missense Variant | | | rs855791 | 22 | 37462936 |  | **G** | A | 5 | Increased iron, ferritin, transferrin55 saturation |
| Splice Donor Variant | | | rs80252000 | 22 | 37464655 |  | G | C | 4 | Unknown |
| Intron (LD with rs855791) | | | rs2413450 | 22 | 37470224 |  | **C** | T | 4 | Increases Iron, Ferritin, Trf-saturation Levels |
| Intron | | | rs11912783 | 22 | 37491204 |  | T | C | 4 | Unknown |
| ?? | | | rs5756523 | 22 | 37513548 |  | **C** | T | 5 | Intergenic variant/ Upstream TMPRSS6 (<10 kb) |
|  |  | **Alpha 1-3-N-acetylgalactosaminyltransferase and alpha 1-3-galactosyltransferase (*ABO*): blood group** | | | | | | | | |
|  | | | rs651007 | 9 |  |  | **C** | T | 4 | Increases ferritin levels |
|  |  | **Aryl hydrocarbon receptor nuclear translocator-like protein 1 (*ARNTL*): Clock associated** | | | | | | | | |
| ?? | | | rs10831990 | 11 | 13197316 |  | C | T | 3a | Intergenic variant/ Upstream ARNTL (<250 kb) |
| ?? | | | rs4756763 | 11 | 13280556 |  | A,C | G | 4 | Promoter Flanking region (ARNT)L |
| Intron | | | rs7119852 | 11 | 13312108 |  | C,G | A | 5 | Unknown |
| Intron | | | rs16912751 | 11 | 13362291 |  | C | T | 4 | Unknown |
| **Fatty acid desaturase 2 (FADS2): fatty acid desaturase** | | | | |  |  |  |  |  |  |
|  | | | rs198475 | 11 | 61526071 | 1.67E-03 | C | T | 3a | Upstream variant FADS2 |
| Missense Variant | | | rs174535 | 11 | 61551356 | 1.77E-04 | **C** | T | 4 | MYRF gene, but in LD with rs174577 in FADS2 (R2=0.92), which increases transferrin |
|  | | | rs76232633 | 11 | 61574164 |  | T | G | 3a | Intron variant FADS2 |
| Intron | | | rs968567 | 11 | 61595564 | 3.79E-05 | T | C | 1f | Unknown |
| **N-Acetyltransferase 2 (NAT2)** | | | |  |  |  |  |  |  |  |
|  | | | rs13263632 | 8 | 17942204 |  | T | C | 4 | Upstream variant NAT2 |
| Intron | | | rs1961456 | 8 | 18255709 |  | **A** | G | 4 | In LD with rs4921915 (R2=0.70), which increases transferrin |
| **Testis-expressed gene 14 (TEX14)** | | | |  |  |  |  |  |  |  |
|  | | | rs61744121 | 17 | 56572347 |  | A | G | 4 | Downstream variant TEX14 |
| Intron | | | rs1267545 | 17 | 56646909 |  | **A** | G | 1f | In LD with rs411988 (R2=0.73), which increases Ferritn Levels. |
| Missense Variant | | | rs770920997 | 17 | 56676678 |  | C | A | 4 | Unknown |
| Missense Variant | | | rs35551271 | 17 | 56693594 |  | C | G | 2a | Unknown |
| Intron | | | rs302874 | 17 | 56767996 |  | **A** | G | 1f | In LD with rs411988 (R2=0.67), which increases Ferritin Levels. |

The variant consequence and features are retrieved from Ensembl release 104 (https://www.ensembl.org/), ClinGen Allele Registry (<http://reg.clinicalgenome.org/>) and ClinGen Pathogenicity Calculator (<http://reg.clinicalgenome.org/site/cg-calculator>). The variants that are associated with T1D are retrieved from the Onengut-Gumuscu et al. study (10). Only the nominally associated P-values for variants associated with T1D (T1D meta P-value <0.01) are listed. The risk allele is highlighted in bold.

**Supplementary Figure 2**

Levels of iron intake (mg/day) by the country during the first three years of life in the TEDDY cohort


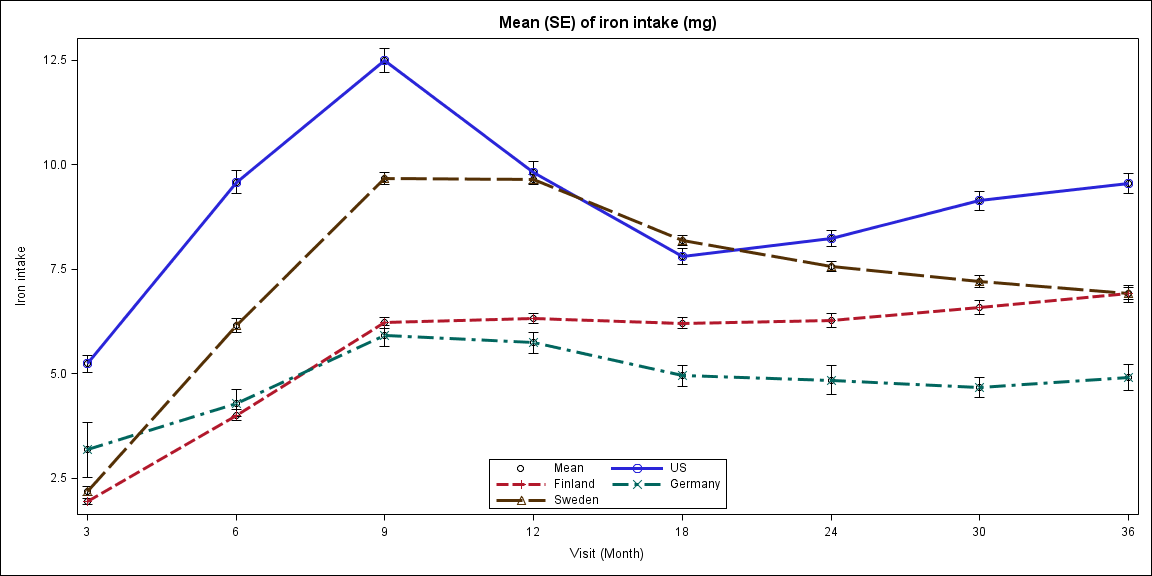


**Supplementary Table 2**

Descriptive characteristics of the TEDDY cohort by persistent autoantibody and type 1 diabetes status

|  | No development of IA  (N=7001) | Development of IA  (N=769)1 | IAA-first2  (N=291) | GADA-first3  (N=334) | Development of T1D  (N=315) |
| --- | --- | --- | --- | --- | --- |
| Sex of child  Female, N/% of total | 3462/49.5 | 347/45.1 | 127/43.6 | 157/47 | 144/45.7 |
| Age at onset of the endpoint/most recent visit  Median/Q1-Q3, years | 10.5/4.2–12.4 | 3/1.5–6 | 1.8/1–3.8 | 4.4/2.3–7.4 | 6.3/3.2–9.3 |
| High-risk HLA-DR/DQ genotype  DR3/4, N/% of total | 2655/37.9 | 375/48.8 | 138/47.4 | 163/48.8 | 176/55.9 |
| First-degree relative with T1D,  Yes, N/% of total | 732/10.5 | 154/20 | 64/22 | 59/17.7 | 82/26.0 |
| Country, N/% of total2  Finland  Germany  Sweden  U.S. | 1519/21.7  473/6.8  2061/29.4  2948/42.1 | 192/25  55/7.2  259/33.7  263/34.2 | 92/31.6  20/6.9  88/30.2  91/31.3 | 67/20.1  15/4.5  124/37.1  128/38.3 | 94/29.8  30/9.5  88/27.9  103/32.7 |

Islet-autoimmunity, IA; childhood type 1 diabetes, T1D.

1 144 out of the 769 individuals that develops persistent IA have more than one autoantibody and/or other types than IAA or GADA as the first persistent autoantibody.

2 Insulin autoantibodies as first appearing persistent autoantibody

3 Glutamic acid decarboxylase autoantibodies as first appearing persistent autoantibody

**Supplementary Figure 3 A and B**

The estimated effect of energy-adjusted iron intake on the log hazard of type 1 diabetes before the age of 10 years using smoothing splines to examine a possible non-linear effect, Figure 3A is with all cases included 3B show the same graph after excluding TGA+.

**A:**


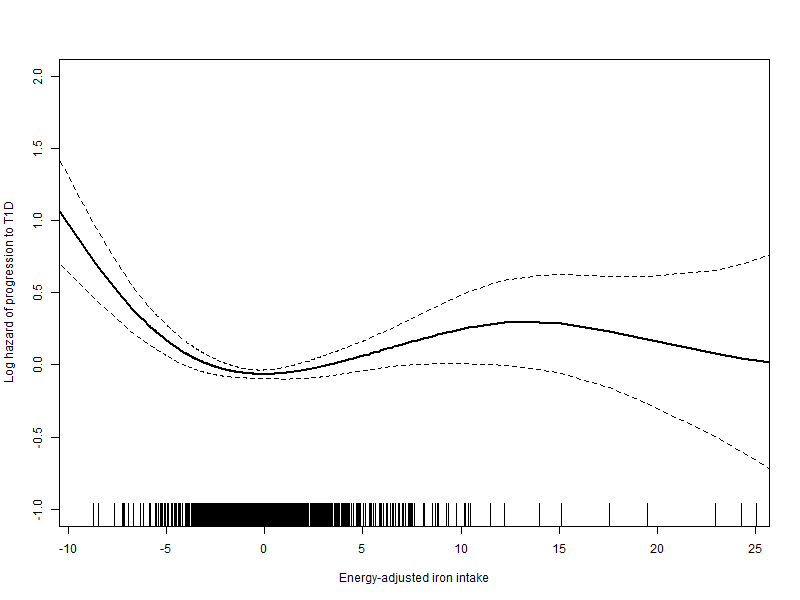


**B:**

**
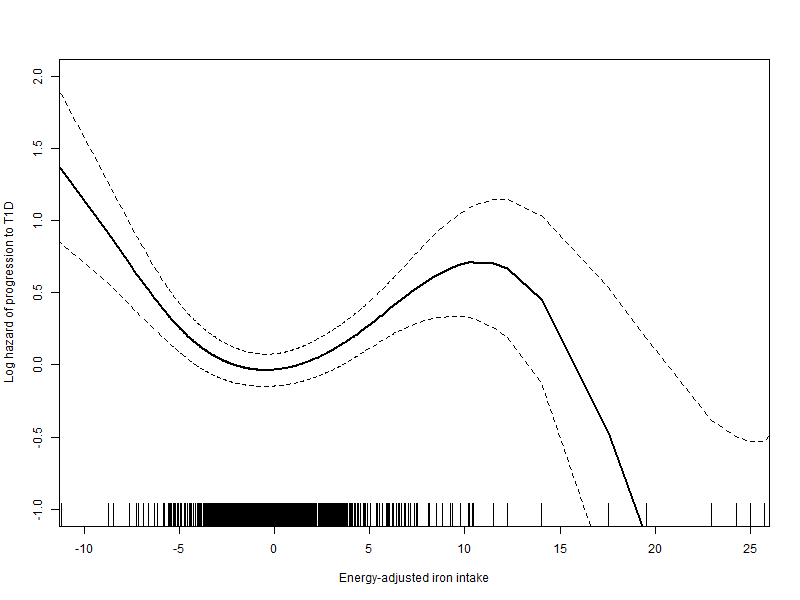
**

A solid line represents the estimated effect and is accompanied by pointwise standard errors shown with dashed lines.

Values on the x-axis represent the energy-adjusted iron intake calculated using the residual method.

Individuals included in this figure are only the middle 99% of energy-adjusted iron intake values, due to dispersed data in the two 0.5%-tails and large pointwise standard errors.

**Supplementary Table 3**

Main effects of the association between single nucleotide polymorphisms (SNPs) and genetic risk score (GRS) and risk of persistent islet autoantibodies and progression to childhood type 1 diabetes

|  |  |  |  |  |  |
| --- | --- | --- | --- | --- | --- |
| Outcome | SNPs/GRS | Gene | Adjusted HR (95%CI) | p-value | q-value |
|  |  |  |  |  |  |
|  |  |  |  |  |  |
| IA | rs10831990 (G1-allele) | *ARNTL* | 1.02 (0.91; 1.14)2 | 0.76 | 0.92 |
| IAA-first | rs10831990 (G-allele) |  | 1.04 (0.87; 1.24) | 0.69 | 0.90 |
| GADA-first | rs10831990 (G -allele) |  | 1.00 (0.84; 1.18) | 0.97 | 0.97 |
| Progression to T1D | rs10831990 (G-allele) |  | 1.09 (0.92; 1.29)3 | 0.30 | 0.51 |
|  |  |  |  |  |  |
| IA | rs11568351 (C-allele) | *SLC40A1* | 1.07 (0.95; 1.20) | 0.29 | 0.85 |
| IAA-first | rs11568351 (C-allele) |  | 1.00 (0.82; 1.22) | 0.99 | 0.99 |
| GADA-first | rs11568351 (C-allele) |  | 1.08 (0.90; 1.29) | 0.39 | 0.76 |
| Progression to T1D | rs11568351 (C-allele) |  | **0.79 (0.66; 0.96)** | **0.02** | 0.32 |
|  |  |  |  |  |  |
| IA | rs12487782 (G-allele) | *TFRC* | **1.11 (1.01; 1.23)** | **0.04** | 0.37 |
| IAA-first | rs12487782 (G-allele) |  | 1.12 (0.95; 1.32) | 0.18 | 0.63 |
| GADA-first | rs12487782 (G-allele) |  | 1.12 (0.96; 1.30) | 0.16 | 0.76 |
| Progression to T1D | rs12487782 (G-allele) |  | 1.09 (0.93; 1.29) | 0.30 | 0.51 |
|  |  |  |  |  |  |
| IA | rs1267545 (A-allele) | *TEX14* | 0.88 (0.60; 1.30) | 0.53 | 0.92 |
| IAA-first | rs1267545 (A-allele) |  | 1.11 (0.60; 2.04) | 0.74 | 0.90 |
| GADA-first | rs1267545 (A-allele) |  | 0.99 (0.56; 1.74) | 0.97 | 0.97 |
| Progression to T1D | rs1267545 (A-allele) |  | 1.21 (0.69; 2.13) | 0.51 | 0.73 |
|  |  |  |  |  |  |
| IA | rs13263632 (A-allele) | *NAT2* | 0.91 (0.72; 1.16) | 0.46 | 0.92 |
| IAA-first | rs13263632 (A-allele) |  | 0.92 (0.62; 1.36) | 0.68 | 0.90 |
| GADA-first | rs13263632 (A-allele) |  | 0.97 (0.68; 1.37) | 0.85 | 0.93 |
| Progression to T1D | rs13263632 (A-allele) |  | 0.77 (0.50; 1.20) | 0.25 | 0.51 |
|  |  |  |  |  |  |
| IA | rs1358893 (A-allele) | *BMP6* | 1.08 (0.70; 1.66) | 0.74 | 0.92 |
| IAA-first | rs1358893 (A-allele) |  | **0.51 (0.26; 0.99)** | **0.05** | 0.35 |
| GADA-first | rs1358893 (A-allele) |  | 1.66 (0.85; 3.26) | 0.14 | 0.76 |
| Progression to T1D | rs1358893 (A-allele) |  | 0.57 (0.29; 1.13) | 0.11 | 0.38 |
|  |  |  |  |  |  |
| IA | rs16912751 (G-allele) | *ARNTL* | 0.98 (0.78; 1.23) | 0.84 | 0.95 |
| IAA-first | rs16912751 (G-allele) |  | 0.90 (0.61; 1.32) | 0.58 | 0.90 |
| GADA-first | rs16912751 (G-allele) |  | 0.99 (0.70; 1.40) | 0.94 | 0.97 |
| Progression to T1D | rs16912751 (G-allele) |  | 0.75 (0.51; 1.10) | 0.14 | 0.38 |
|  |  |  |  |  |  |
| IA | rs174535 (G-allele) | *FADS2* | 1.00 (0.90; 1.11) | 0.95 | 0.96 |
| IAA-first | rs174535 (G-allele) |  | 0.94 (0.80; 1.12) | 0.49 | 0.90 |
| GADA-first | rs174535 (G-allele) |  | 1.04 (0.89; 1.22) | 0.63 | 0.83 |
| Progression to T1D | rs174535 (G-allele) |  | 0.99 (0.84; 1.17) | 0.92 | 0.98 |
|  |  |  |  |  |  |
| IA | rs17596719 (A-allele) | *HFE* | 0.92 (0.77; 1.10) | 0.36 | 0.85 |
| IAA-first | rs17596719 (A-allele) |  | 0.91 (0.68; 1.23) | 0.55 | 0.90 |
| GADA-first | rs17596719 (A-allele) |  | 0.97 (0.74; 1.27) | 0.82 | 0.93 |
| Progression to T1D | rs17596719 (A-allele) |  | 1.23 (0.94; 1.63) | 0.14 | 0.38 |
|  |  |  |  |  |  |
| IA | rs17673852 (G-allele) | *BMP6* | 1.02 (0.87; 1.21) | 0.78 | 0.92 |
| IAA-first | rs17673852 (G-allele) |  | 1.25 (0.98; 1.60) | 0.07 | 0.40 |
| GADA-first | rs17673852 (G-allele) |  | 0.81 (0.62; 1.08) | 0.15 | 0.76 |
| Progression to T1D | rs17673852 (G-allele) |  | 1.29 (0.99; 1.67) | 0.06 | 0.33 |
|  |  |  |  |  |  |
| IA | rs1799852 (A-allele) | *HFE* | 1.06 (0.92; 1.23) | 0.42 | 0.92 |
| IAA-first | rs1799852 (A-allele) |  | 1.04 (0.82; 1.32) | 0.74 | 0.90 |
| GADA-first | rs1799852 (A-allele) |  | 0.96 (0.76; 1.21) | 0.75 | 0.88 |
| Progression to T1D | rs1799852 (A-allele) |  | 1.11 (0.89; 1.39) | 0.34 | 0.54 |
|  |  |  |  |  |  |
| IA | rs1799945 (G-allele) | *TF* | 0.96 (0.82; 1.13) | 0.65 | 0.92 |
| IAA-first | rs1799945 (G-allele) |  | 1.15 (0.89; 1.47) | 0.28 | 0.63 |
| GADA-first | rs1799945 (G-allele) |  | 0.87 (0.67; 1.12) | 0.27 | 0.76 |
| Progression to T1D | rs1799945 (G-allele) |  | 0.77 (0.58; 1.01) | 0.06 | 0.33 |
|  |  |  |  |  |  |
| IA | rs1800562 (A-allele) | *HFE* | 1.12 (0.88; 1.42) | 0.35 | 0.85 |
| IAA-first | rs1800562 (A-allele) |  | 0.96 (0.64; 1.46) | 0.86 | 0.92 |
| GADA-first | rs1800562 (A-allele) |  | 1.27 (0.91; 1.78) | 0.17 | 0.76 |
| Progression to T1D | rs1800562 (A-allele) |  | 0.91 (0.61; 1.35) | 0.63 | 0.80 |
|  |  |  |  |  |  |
| IA | rs1961456 (G-allele) | *NAT2* | 1.02 (0.91; 1.13) | 0.76 | 0.92 |
| IAA-first | rs1961456 (G-allele) |  | 1.03 (0.87; 1.22) | 0.74 | 0.90 |
| GADA-first | rs1961456 (G-allele) |  | 0.96 (0.82; 1.14) | 0.66 | 0.83 |
| Progression to T1D | rs1961456 (G-allele) |  | 0.88 (0.74; 1.04) | 0.13 | 0.38 |
|  |  |  |  |  |  |
| IA | rs198475 (A-allele) | *FADS2* | 1.07 (0.95; 1.21) | 0.26 | 0.85 |
| IAA-first | rs198475 (A-allele) |  | 0.88 (0.71; 1.09) | 0.24 | 0.63 |
| GADA-first | rs198475 (A-allele) |  | 1.16 (0.97; 1.39) | 0.10 | 0.76 |
| Progression to T1D | rs198475 (A-allele) |  | 0.98 (0.81; 1.18) | 0.80 | 0.88 |
|  |  |  |  |  |  |
| IA | rs2071303 (G-allele) | *HFE* | **0.85 (0.76; 0.94)** | **0.002** | 0.08 |
| IAA-first | rs2071303 (G-allele) |  | **0.81 (0.68; 0.97)** | **0.02** | 0.35 |
| GADA-first | rs2071303 (G-allele) |  | 0.93 (0.79; 1.09) | 0.38 | 0.76 |
| Progression to T1D | rs2071303 (G-allele) |  | **0.83 (0.69; 0.99)** | **0.04** | 0.33 |
|  |  |  |  |  |  |
| IA | rs2413450 (A-allele) | *TMPRSS6* | 1.05 (0.95; 1.17) | 0.30 | 0.85 |
| IAA-first | rs2413450 (A-allele) |  | 1.06 (0.90; 1.25) | 0.49 | 0.90 |
| GADA-first | rs2413450 (A-allele) |  | 1.04 (0.89; 1.21) | 0.65 | 0.83 |
| Progression to T1D | rs2413450 (A-allele) |  | 1.09 (0.93; 1.27) | 0.31 | 0.51 |
|  |  |  |  |  |  |
| IA | rs302874 (A-allele) | *TEX14* | 1.01 (0.69; 1.48) | 0.96 | 0.96 |
| IAA-first | rs302874 (A-allele) |  | 0.86 (0.45; 1.65) | 0.66 | 0.90 |
| GADA-first | rs302874 (A-allele) |  | 1.17 (0.69; 2.01) | 0.56 | 0.83 |
| Progression to T1D | rs302874 (A-allele) |  | 1.17 (0.67; 2.05) | 0.59 | 0.80 |
|  |  |  |  |  |  |
| IA | rs406271 (G-allele) | *TFRC* | 0.93 (0.84; 1.04) | 0.18 | 0.85 |
| IAA-first | rs406271 (G-allele) |  | 0.91 (0.76; 1.08) | 0.26 | 0.63 |
| GADA-first | rs406271 (G-allele) |  | 0.93 (0.79; 1.09) | 0.35 | 0.76 |
| Progression to T1D | rs406271 (G-allele) |  | 1.03 (0.86; 1.22) | 0.78 | 0.88 |
|  |  |  |  |  |  |
| IA | rs4756763 (G-allele) | *ARNTL* | 0.99 (0.90; 1.10) | 0.87 | 0.95 |
| IAA-first | rs4756763 (G-allele) |  | 1.12 (0.95; 1.31) | 0.19 | 0.63 |
| GADA-first | rs4756763 (G-allele) |  | 0.94 (0.81; 1.10) | 0.45 | 0.80 |
| Progression to T1D | rs4756763 (G-allele) |  | 1.13 (0.96; 1.32) | 0.15 | 0.38 |
|  |  |  |  |  |  |
| IA | rs5756523 (G-allele) | *TMPRSS6* | 1.09 (0.96; 1.24) | 0.18 | 0.85 |
| IAA-first | rs5756523 (G-allele) |  | 1.12 (0.91; 1.38) | 0.27 | 0.63 |
| GADA-first | rs5756523 (G-allele) |  | 0.94 (0.77; 1.15) | 0.57 | 0.83 |
| Progression to T1D | rs5756523 (G-allele) |  | 0.96 (0.79; 1.18) | 0.73 | 0.86 |
|  |  |  |  |  |  |
| IA | rs579459 (G-allele) | *TMPRSS6* | **0.88 (0.77; 0.99)** | **0.04** | 0.37 |
| IAA-first | rs579459 (G-allele) |  | 0.90 (0.73; 1.10) | 0.29 | 0.63 |
| GADA-first | rs579459 (G-allele) |  | 0.91 (0.76; 1.10) | 0.34 | 0.76 |
| Progression to T1D | rs579459 (G-allele) |  | 0.85 (0.70; 1.03) | 0.10 | 0.38 |
|  |  |  |  |  |  |
| IA | rs6558052 (G-allele) | *SLC39A14* | 1.02 (0.82; 1.25) | 0.89 | 0.95 |
| IAA-first | rs6558052 (G-allele) |  | 1.05 (0.74; 1.48) | 0.78 | 0.90 |
| GADA-first | rs6558052 (G-allele) |  | 1.09 (0.80; 1.48) | 0.59 | 0.83 |
| Progression to T1D | rs6558052 (G-allele) |  | 1.00 (0.70; 1.44) | 0.99 | 0.99 |
|  |  |  |  |  |  |
| IA | rs738149 (A-allele) | *TMPRSS6* | **1.12 (1.00; 1.25)** | **0.05** | 0.37 |
| IAA-first | rs738149 (A-allele) |  | **1.23 (1.03; 1.47)** | **0.02** | 0.35 |
| GADA-first | rs738149 (A-allele) |  | 1.06 (0.89; 1.25) | 0.53 | 0.83 |
| Progression to T1D | rs738149 (A-allele) |  | 1.00 (0.84; 1.20) | 0.97 | 0.99 |
|  |  |  |  |  |  |
| IA | rs7385804 (C-allele) | *TFR2* | 1.05 (0.95; 1.17) | 0.31 | 0.85 |
| IAA-first | rs7385804 (C-allele) |  | 1.02 (0.86; 1.20) | 0.82 | 0.90 |
| GADA-first | rs7385804 (C-allele) |  | 1.06 (0.91; 1.24) | 0.46 | 0.80 |
| Progression to T1D | rs7385804 (C-allele) |  | 0.91 (0.77; 1.07) | 0.25 | 0.51 |
|  |  |  |  |  |  |
| IA | rs7833266 (G-allele) | *SLC39A14* | 1.06 (0.95; 1.17) | 0.30 | 0.85 |
| IAA-first | rs7833266 (G-allele) |  | 1.11 (0.94; 1.32) | 0.21 | 0.63 |
| GADA-first | rs7833266 (G-allele) |  | 0.97 (0.82; 1.14) | 0.71 | 0.87 |
| Progression to T1D | rs7833266 (G-allele) |  | 0.96 (0.82; 1.12) | 0.60 | 0.80 |
|  |  |  |  |  |  |
| IA | rs855791 (A-allele) | *TMPRSS6* | 0.98 (0.88; 1.08) | 0.67 | 0.92 |
| IAA-first | rs855791 (A-allele) |  | 1.05 (0.88; 1.24) | 0.60 | 0.90 |
| GADA-first | rs855791 (A-allele) |  | 0.90 (0.77; 1.06) | 0.21 | 0.76 |
| Progression to T1D | rs855791 (A-allele) |  | 1.03 (0.87; 1.21) | 0.73 | 0.86 |
|  |  |  |  |  |  |
| IA | rs911752 (G-allele) | *BMP6* | 1.03 (0.86; 1.23) | 0.76 | 0.92 |
| IAA-first | rs911752 (G-allele) |  | 0.76 (0.58; 1.00) | 0.05 | 0.35 |
| GADA-first | rs911752 (G-allele) |  | 1.20 (0.90; 1.59) | 0.22 | 0.76 |
| Progression to T1D | rs911752 (G-allele) |  | **0.73 (0.56; 0.97)** | **0.03** | 0.33 |
|  |  |  |  |  |  |
| IA | rs9379137 (G-allele) | *BMP6* | 1.07 (0.69; 1.66) | 0.75 | 0.92 |
| IAA-first | rs9379137 (G-allele) |  | **0.48 (0.25; 0.94)** | **0.03** | 0.35 |
| GADA-first | rs9379137 (G-allele) |  | 1.58 (0.80; 3.13) | 0.19 | 0.76 |
| Progression to T1D | rs9379137 (G-allele) |  | 0.51 (0.26; 1.01) | 0.05 | 0.33 |
|  |  |  |  |  |  |
| IA | rs968567 (A-allele) | *FADS2* | 1.05 (0.91; 1.21) | 0.49 | 0.92 |
| IAA-first | rs968567 (A-allele) |  | 0.97 (0.77; 1.23) | 0.81 | 0.90 |
| GADA-first | rs968567 (A-allele) |  | 1.18 (0.97; 1.45) | 0.11 | 0.76 |
| Progression to T1D | rs968567 (A-allele) |  | 0.92 (0.74; 1.15) | 0.48 | 0.72 |
|  |  |  |  |  |  |
| IA | rs9859260 (G-allele) | *TFRC* | 0.92 (0.83; 1.02) | 0.11 | 0.73 |
| IAA-first | rs9859260 (G-allele) |  | 0.87 (0.74; 1.03) | 0.10 | 0.48 |
| GADA-first | rs9859260 (G-allele) |  | 0.92 (0.79; 1.07) | 0.28 | 0.76 |
| Progression to T1D | rs9859260 (G-allele) |  | 1.09 (0.92; 1.29) | 0.30 | 0.51 |
|  |  |  |  |  |  |
| IA | GRS4 |  | 1.02 (0.94; 1.11) | 0.62 | 0.92 |
| IAA-first | GRS |  | 1.00 (0.88; 1.15) | 0.96 | 0.99 |
| GADA-first | GRS |  | 1.07 (0.94; 1.21) | 0.31 | 0.76 |
| Progression to T1D | GRS |  | 0.90 (0.79; 1.03) | 0.14 | 0.38 |

Hazard ratio, HR; islet-autoimmunity, IA; insulin autoantibodies as first appearing persistent autoantibody, IAA-first; glutamic acid decarboxylase autoantibodies as first appearing autoantibody, GADA-first; childhood type 1 diabetes, T1D; aryl hydrocarbon receptor nuclear translocator-like protein 1, ARNTL; solute carrier family 40, SLC40A1; transmembrane serine protease 6, TMPRSS6; transferrin receptor 1, TFRC; testis-expressed gene 14, TEX14; N-Acetyltransferase 2, NAT2; bone morphogenetic protein 6, BMP6; fatty acid desaturase 2, FADS2; homeostatic iron regulator, HFE; transferrin, TF; solute carrier family 39 member 14, SLC39A14; transferrin receptor 2, TFR2.

Chromosomal and gene positions for the SNPs are stated in Supplementary Table 1.

1 HR is for one increase in the minor allele/risk allele for all SNPs

2 Covariates included in the model with IA, IAA-first or GADA-first as the outcome: sex, HLA-genotype, country, first-degree relative with T1D and principal components 1 and 2.

3 Covariates included in the model with progression from persistent autoantibody positivity to overt T1D: sex, HLA-genotype, country, first-degree relative with T1D, principal components 1 and 2, age at seroconversion and type of first appearing autoantibody.

4 HR are for one increase in the genetic risk score (number of risk alleles for elevated circulating iron).

*Bold letters indicate significance at a threshold of 5% level.

**Supplementary Table 4**

P-values for interaction between single nucleotide polymorphisms (SNPs) associated with iron homeostasis pathways and energy-adjusted iron intake on risk of islet autoantibodies (IA), insulin autoantibodies only (IAA-first) and glutamic acid decarboxylase autoantibodies only (GADA-first)

| **SNPs** | **Gene** | **Iron intake (continuous)** | | **Iron intake (categorical)** | |
| --- | --- | --- | --- | --- | --- |
| **IA** |  | **p-value** | **q-value** | **p-value** | **q-value** |
| rs10831990 (G-allele) | *ARNTL* | 0.16 | 0.78 | 0.51 | 0.83 |
| rs11568351 (C-allele) | *SLC40A1* | 0.37 | 0.78 | 0.36 | 0.63 |
| rs12487782 (G-allele) | *TFRC* | 0.35 | 0.78 | 0.31 | 0.60 |
| rs1267545 (A-allele) | *TEX14* | 0.34 | 0.78 | 0.19 | 0.60 |
| rs13263632 (A-allele) | *NAT2* | 0.34 | 0.78 | 0.31 | 0.60 |
| rs1358893 (A-allele) | *BMP6* | 0.58 | 0.91 | 0.69 | 0.85 |
| rs16912751 (G-allele) | *ARNTL* | 0.95 | 0.99 | 0.66 | 0.85 |
| rs174535 (G-allele) | *FADS2* | 0.83 | 0.98 | 0.29 | 0.60 |
| rs17596719 (A-allele) | *HFE* | 0.76 | 0.98 | 0.91 | 0.91 |
| rs17673852 (G-allele) | *BMP6* | 0.26 | 0.78 | 0.20 | 0.60 |
| rs1799852 (A-allele) | *HFE* | 0.31 | 0.78 | 0.11 | 0.60 |
| rs1800562 (A-allele) | *HFE* | 0.47 | 0.82 | 0.35 | 0.63 |
| rs1961456 (G-allele) | *NAT2* | 0.22 | 0.78 | 0.74 | 0.85 |
| rs198475 (A-allele) | *FADS2* | 0.99 | 0.99 | 0.27 | 0.60 |
| rs2071303 (G-allele) | *HFE* | 0.98 | 0.99 | 0.55 | 0.85 |
| rs2413450 (A-allele) | *TMPRSS6* | 0.74 | 0.98 | 0.28 | 0.60 |
| rs302874 (A-allele) | *TEX14* | 0.38 | 0.78 | 0.16 | 0.60 |
| rs406271 (G-allele) | *TFRC* | 0.40 | 0.79 | 0.62 | 0.85 |
| rs4756763 (G-allele) | *ARNTL* | 0.66 | 0.97 | 0.82 | 0.87 |
| rs5756523 (G-allele) | *TMPRSS6* | 0.054 | 0.50 | 0.11 | 0.60 |
| rs579459 (G-allele) | *TMPRSS6* | **0.021** | 0.43 | **0.004** | 0.15 |
| rs6558052 (G-allele) | *SLC39A14* | 0.67 | 0.97 | 0.29 | 0.60 |
| rs738149 (A-allele) | *TMPRSS6* | 0.15 | 0.78 | 0.59 | 0.85 |
| rs7385804 (C-allele) | *TFR2* | **0.03** | 0.43 | 0.25 | 0.60 |
| rs7833266 (G-allele) | *SLC39A14* | 0.88 | 0.98 | 0.82 | 0.87 |
| rs911752 (G-allele) | *BMP6* | 0.81 | 0.98 | 0.69 | 0.85 |
| rs9379137 (G-allele) | *BMP6* | 0.56 | 0.91 | 0.64 | 0.85 |
| rs968567 (A-allele) | *FADS2* | 0.06 | 0.50 | 0.17 | 0.60 |
| rs9859260 (G-allele) | *TFRC* | 0.89 | 0.98 | 0.73 | 0.85 |
| rs1799945 (G-allele) | *TF* | 0.89 | 0.98 | 0.87 | 0.90 |
| rs855791 (A-allele) | *TMPRSS6* | 0.22 | 0.78 | **0.05** | 0.60 |
| Genetic risk score |  | 0.45 | 0.82 | 0.17 | 0.60 |
| **IAA first** |  | **p-value** | **q-value** | **p-value** | **q-value** |
| rs10831990 (G-allele) | *ARNTL* | 0.30 | 0.96 | 0.67 | 0.86 |
| rs11568351 (C-allele) | *SLC40A1* | 0.63 | 0.96 | 0.38 | 0.86 |
| rs12487782 (G-allele) | *TFRC* | 0.48 | 0.96 | 0.66 | 0.86 |
| rs1267545 (A-allele) | *TEX14* | 0.79 | 0.96 | 0.52 | 0.86 |
| rs13263632 (A-allele) | *NAT2* | 0.94 | 0.97 | 0.83 | 0.91 |
| rs1358893 (A-allele) | *BMP6* | 0.36 | 0.96 | 0.55 | 0.86 |
| rs16912751 (G-allele) | *ARNTL* | 0.57 | 0.96 | 0.30 | 0.86 |
| rs174535 (G-allele) | *FADS2* | 0.60 | 0.96 | 0.19 | 0.69 |
| rs17596719 (A-allele) | *HFE* | 0.39 | 0.96 | 0.50 | 0.86 |
| rs17673852 (G-allele) | *BMP6* | 0.18 | 0.96 | 0.15 | 0.60 |
| rs1799852 (A-allele) | *HFE* | 0.99 | 0.99 | 0.66 | 0.86 |
| rs1800562 (A-allele) | *HFE* | 0.72 | 0.96 | 0.32 | 0.86 |
| rs1961456 (G-allele) | *NAT2* | 0.84 | 0.96 | 0.95 | 0.96 |
| rs198475 (A-allele) | *FADS2* | 0.22 | 0.96 | 0.06 | 0.53 |
| rs2071303 (G-allele) | *HFE* | 0.73 | 0.96 | 0.64 | 0.86 |
| rs2413450 (A-allele) | *TMPRSS6* | **0.02** | 0.28 | **0.03** | 0.29 |
| rs302874 (A-allele) | *TEX14* | 0.80 | 0.96 | 0.60 | 0.86 |
| rs406271 (G-allele) | *TFRC* | 0.33 | 0.96 | 0.60 | 0.86 |
| rs4756763 (G-allele) | *ARNTL* | 0.83 | 0.96 | 0.73 | 0.86 |
| rs5756523 (G-allele) | *TMPRSS6* | 0.38 | 0.96 | 0.47 | 0.86 |
| rs579459 (G-allele) | *TMPRSS6* | 0.12 | 0.80 | 0.11 | 0.59 |
| rs6558052 (G-allele) | *SLC39A14* | 0.81 | 0.96 | 0.90 | 0.96 |
| rs738149 (A-allele) | *TMPRSS6* | 0.10 | 0.80 | 0.12 | 0.59 |
| rs7385804 (C-allele) | *TFR2* | 0.48 | 0.96 | 0.68 | 0.86 |
| rs7833266 (G-allele) | *SLC39A14* | 0.93 | 0.97 | 0.59 | 0.86 |
| rs911752 (G-allele) | *BMP6* | 0.75 | 0.96 | 0.96 | 0.96 |
| rs9379137 (G-allele) | *BMP6* | 0.36 | 0.96 | 0.55 | 0.86 |
| rs968567 (A-allele) | *FADS2* | 0.94 | 0.97 | 0.12 | 0.59 |
| rs9859260 (G-allele) | *TFRC* | 0.51 | 0.96 | 0.72 | 0.86 |
| rs1799945 (G-allele) | *TF* | 0.68 | 0.96 | 0.79 | 0.90 |
| rs855791 (A-allele) | *TMPRSS6* | **0.01** | 0.23 | **0.001** | **0.03** |
| Genetic risk score |  | **0.04** | 0.43 | **0.02** | 0.29 |
| **GADA-first** |  | **p-value** | **q-value** | **p-value** | **q-value** |
| rs10831990 (G-allele) | *ARNTL* | 0.73 | 0.92 | 0.91 | 0.98 |
| rs11568351 (C-allele) | *SLC40A1* | 0.08 | 0.62 | 0.15 | 0.69 |
| rs12487782 (G-allele) | *TFRC* | 0.61 | 0.89 | 0.34 | 0.87 |
| rs1267545 (A-allele) | *TEX14* | **0.04** | 0.61 | 0.09 | 0.69 |
| rs13263632 (A-allele) | *NAT2* | 0.35 | 0.81 | 0.14 | 0.69 |
| rs1358893 (A-allele) | *BMP6* | 0.15 | 0.71 | 0.07 | 0.69 |
| rs16912751 (G-allele) | *ARNTL* | 0.91 | 0.94 | 0.90 | 0.98 |
| rs174535 (G-allele) | *FADS2* | 0.44 | 0.81 | 0.73 | 0.98 |
| rs17596719 (A-allele) | *HFE* | 0.82 | 0.94 | 0.23 | 0.78 |
| rs17673852 (G-allele) | *BMP6* | 0.69 | 0.92 | 0.61 | 0.98 |
| rs1799852 (A-allele) | *HFE* | 0.41 | 0.81 | 0.65 | 0.98 |
| rs1800562 (A-allele) | *HFE* | 0.36 | 0.81 | 0.96 | 0.99 |
| rs1961456 (G-allele) | *NAT2* | 0.36 | 0.81 | 0.37 | 0.88 |
| rs198475 (A-allele) | *FADS2* | 0.72 | 0.92 | 0.77 | 0.98 |
| rs2071303 (G-allele) | *HFE* | 0.88 | 0.94 | 0.61 | 0.98 |
| rs2413450 (A-allele) | *TMPRSS6* | 0.09 | 0.62 | 0.73 | 0.98 |
| rs302874 (A-allele) | *TEX14* | 0.06 | 0.61 | 0.051 | 0.69 |
| rs406271 (G-allele) | *TFRC* | 0.34 | 0.81 | 0.50 | 0.98 |
| rs4756763 (G-allele) | *ARNTL* | 0.42 | 0.81 | 0.30 | 0.82 |
| rs5756523 (G-allele) | *TMPRSS6* | 0.25 | 0.81 | 0.28 | 0.82 |
| rs579459 (G-allele) | *TMPRSS6* | 0.20 | 0.73 | 0.14 | 0.69 |
| rs6558052 (G-allele) | *SLC39A14* | 0.44 | 0.81 | 0.19 | 0.77 |
| rs738149 (A-allele) | *TMPRSS6* | 0.51 | 0.85 | 0.92 | 0.98 |
| rs7385804 (C-allele) | *TFR2* | **0.01** | 0.30 | 0.21 | 0.78 |
| rs7833266 (G-allele) | *SLC39A14* | 0.54 | 0.85 | 0.44 | 0.97 |
| rs911752 (G-allele) | *BMP6* | 0.78 | 0.92 | 0.83 | 0.98 |
| rs9379137 (G-allele) | *BMP6* | 0.14 | 0.71 | 0.07 | 0.69 |
| rs968567 (A-allele) | *FADS2* | 0.20 | 0.73 | 0.80 | 0.98 |
| rs9859260 (G-allele) | *TFRC* | 0.96 | 0.96 | 0.52 | 0.98 |
| rs1799945 (G-allele) | *TF* | 0.89 | 0.94 | 0.75 | 0.98 |
| rs855791 (A-allele) | *TMPRSS6* | 0.62 | 0.89 | 0.99 | 0.99 |
| Genetic risk score |  | 0.53 | 0.85 | 0.90 | 0.98 |

Aryl hydrocarbon receptor nuclear translocator-like protein 1, ARNTL; solute carrier family 40, SLC40A1; transmembrane serine protease 6, TMPRSS6; transferrin receptor 1, TFRC; testis-expressed gene 14, TEX14; N-Acetyltransferase 2, NAT2; bone morphogenetic protein 6, BMP6; fatty acid desaturase 2, FADS2; homeostatic iron regulator, HFE; transferrin, TF; solute carrier family 39 member 14, SLC39A14; transferrin receptor 2, TFR2.

*Bold letters indicate significance at a 5% level.

**Supplementary Table 5**

P-values for interaction between single nucleotide polymorphisms (SNPs) associated with iron homeostasis pathways and energy-adjusted iron intake on risk of progression from islet autoimmunity to overt childhood type 1 diabetes

| **SNPs** | **Gene** | **Iron intake (continuous)** | | **Iron intake (categorical)** | |
| --- | --- | --- | --- | --- | --- |
|  |  | **p-value** | **q-value** | **p-value** | **q-value** |
| rs10831990 (G-allele) | *ARNTL* | 0.63 | 0.93 | 0.51 | 0.68 |
| rs11568351 (C-allele) | *SLC40A1* | 0.55 | 0.91 | **0.0005** | **0.02** |
| rs12487782 (G-allele) | *TFRC* | **0.01** | 0.14 | **0.03** | 0.36 |
| rs1267545 (A-allele) | *TEX14* | 0.56 | 0.91 | 0.69 | 0.78 |
| rs13263632 (A-allele) | *NAT2* | 0.43 | 0.88 | 0.52 | 0.68 |
| rs1358893 (A-allele) | *BMP6* | 0.76 | 0.93 | 0.50 | 0.68 |
| rs16912751 (G-allele) | *ARNTL* | 0.20 | 0.65 | 0.22 | 0.67 |
| rs174535 (G-allele) | *FADS2* | 0.16 | 0.65 | 0.35 | 0.67 |
| rs17596719 (A-allele) | *HFE* | 0.79 | 0.93 | 0.42 | 0.67 |
| rs17673852 (G-allele) | *BMP6* | **0.045** | 0.50 | 0.10 | 0.48 |
| rs1799852 (A-allele) | *HFE* | 0.41 | 0.88 | 0.97 | 0.97 |
| rs1800562 (A-allele) | *HFE* | 1.00 | 1.00 | 0.39 | 0.67 |
| rs1961456 (G-allele) | *NAT2* | 0.58 | 0.91 | 0.96 | 0.97 |
| rs198475 (A-allele) | *FADS2* | 0.51 | 0.91 | 0.36 | 0.67 |
| rs2071303 (G-allele) | *HFE* | 0.13 | 0.65 | 0.14 | 0.52 |
| rs2413450 (A-allele) | *TMPRSS6* | 0.67 | 0.93 | 0.051 | 0.42 |
| rs302874 (A-allele) | *TEX14* | 0.89 | 0.97 | 0.94 | 0.97 |
| rs406271 (G-allele) | *TFRC* | 0.06 | 0.52 | 0.30 | 0.67 |
| rs4756763 (G-allele) | *ARNTL* | 0.18 | 0.65 | 0.56 | 0.68 |
| rs5756523 (G-allele) | *TMPRSS6* | 0.78 | 0.93 | 0.39 | 0.67 |
| rs579459 (G-allele) | *TMPRSS6* | 0.26 | 0.73 | 0.10 | 0.48 |
| rs6558052 (G-allele) | *SLC39A14* | 0.26 | 0.73 | 0.12 | 0.49 |
| rs738149 (A-allele) | *TMPRSS6* | **0.002** | 0.08 | **0.01** | 0.25 |
| rs7385804 (C-allele) | *TFR2* | 0.42 | 0.88 | 0.75 | 0.83 |
| rs7833266 (G-allele) | *SLC39A14* | 0.81 | 0.93 | 0.46 | 0.68 |
| rs911752 (G-allele) | *BMP6* | 0.70 | 0.93 | 0.39 | 0.67 |
| rs9379137 (G-allele) | *BMP6* | 0.76 | 0.93 | 0.54 | 0.68 |
| rs968567 (A-allele) | *FADS2* | 0.95 | 0.98 | 0.42 | 0.67 |
| rs9859260 (G-allele) | *TFRC* | 0.10 | 0.65 | 0.25 | 0.67 |
| rs1799945 (G-allele) | *TF* | 0.38 | 0.88 | 0.07 | 0.47 |
| rs855791 (A-allele) | *TMPRSS6* | 0.93 | 0.98 | 0.20 | 0.66 |
| Genetic risk score |  | 0.57 | 0.91 | 0.26 | 0.67 |

Aryl hydrocarbon receptor nuclear translocator-like protein 1, ARNTL; solute carrier family 40, SLC40A1; transmembrane serine protease 6, TMPRSS6; transferrin receptor 1, TFRC; testis-expressed gene 14, TEX14; N-Acetyltransferase 2, NAT2; bone morphogenetic protein 6, BMP6; fatty acid desaturase 2, FADS2; homeostatic iron regulator, HFE; transferrin, TF; solute carrier family 39 member 14, SLC39A14; transferrin receptor 2, TFR2.

*Bold letters indicate significance at a threshold of 5% level.

**Supplementary Table 6**

Minor allele frequency (MAF) of iron homeostasis pathway single nucleotide polymorphisms (SNPs) by country and the whole cohort.

| SNPs | Gene | The US | Finland | Germany | Sweden | All |
| --- | --- | --- | --- | --- | --- | --- |
| rs10831990 (G-allele) | *ARNTL* | 0.25 | 0.32 | 0.27 | 0.27 | 0.27 |
| rs11568351 (C-allele) | *SLC40A1* | 0.20 | 0.22 | 0.23 | 0.26 | 0.22 |
| **rs11912783 (A-allele)** | *TMPRSS6* | **<0.01** | **<0.01** | **<0.01** | **<0.01** | **<0.01** |
| rs12487782 (G-allele) | *TFRC* | 0.49 | 0.49 | 0.48 | 0.46 | 0.48 |
| rs1267545 (A-allele) | *TEX14* | 0.40 | 0.36 | 0.36 | 0.40 | 0.39 |
| rs13263632 (A-allele) | *NAT2* | 0.05 | 0.03 | 0.06 | 0.06 | 0.05 |
| rs1358893 (A-allele) | *BMP6* | 0.39 | 0.31 | 0.38 | 0.36 | 0.36 |
| rs16912751 (G-allele) | *ARNTL* | 0.06 | 0.05 | 0.04 | 0.04 | 0.051 |
| rs174535 (G-allele) | *FADS2* | 0.37 | 0.40 | 0.32 | 0.34 | 0.37 |
| rs17596719 (A-allele) | *HFE* | 0.10 | 0.09 | 0.10 | 0.09 | 0.09 |
| rs17673852 (G-allele) | *BMP6* | 0.09 | 0.15 | 0.08 | 0.08 | 0.10 |
| rs1799852 (A-allele) | *HFE* | 0.11 | 0.17 | 0.13 | 0.13 | 0.13 |
| rs1799945 (G-allele) | *TF* | 0.12 | 0.11 | 0.13 | 0.10 | 0.11 |
| rs1800562 (A-allele) | *HFE* | 0.05 | 0.03 | 0.05 | 0.04 | 0.04 |
| rs1961456 (G-allele) | *NAT2* | 0.32 | 0.33 | 0.31 | 0.28 | 0.31 |
| rs198475 (A-allele) | *FADS2* | 0.25 | 0.12 | 0.26 | 0.24 | 0.22 |
| rs2071303 (G-allele) | *HFE* | 0.40 | 0.35 | 0.37 | 0.36 | 0.37 |
| rs2413450 (A-allele) | *TMPRSS6* | 0.47 | 0.43 | 0.46 | 0.45 | 0.46 |
| rs302874 (A-allele) | *TEX14* | 0.42 | 0.39 | 0.38 | 0.42 | 0.41 |
| **rs35551271 (G-allele)** | *TEX14* | **<0.01** | **<0.01** | **<0.01** | **0.01** | **0.01** |
| rs406271 (G-allele) | *TFRC* | 0.32 | 0.39 | 0.32 | 0.34 | 0.34 |
| rs4756763 (G-allele) | *ARNTL* | 0.44 | 0.48 | 0.43 | 0.42 | 0.44 |
| rs5756523 (G-allele) | *TMPRSS6* | 0.21 | 0.14 | 0.20 | 0.18 | 0.18 |
| rs579459 (G-allele) | *TMPRSS6* | 0.21 | 0.22 | 0.22 | 0.23 | 0.22 |
| **rs61744121 (A-allele)** | *TEX14* | **0.01** | **0.03** | **0.02** | **0.01** | **0.02** |
| rs6558052 (G-allele) | *SLC39A14* | 0.09 | 0.03 | 0.04 | 0.05 | 0.06 |
| **rs7119852 (A-allele)** | *ARNTL* | **0.03** | **0.02** | **0.03** | **0.02** | **0.02** |
| rs738149 (A-allele) | *TMPRSS6* | 0.28 | 0.24 | 0.30 | 0.26 | 0.27 |
| rs7385804 (C-allele) | *TFR2* | 0.37 | 0.44 | 0.40 | 0.40 | 0.39 |
| **rs76232633 (A-allele)** | *FADS2* | **<0.01** | **<0.01** | **<0.01** | **<0.01** | **<0.01** |
| **rs770920997 (C-allele)** | *TEX14* | **<0.01** | **<0.01** | **<0.01** | **<0.01** | **<0.01** |
| rs7833266 (G-allele) | *SLC39A14* | 0.32 | 0.37 | 0.34 | 0.32 | 0.33 |
| **rs80252000 (G-allele)** | *TMPRSS6* | **<0.01** | **<0.01** | **<0.01** | **<0.01** | **<0.01** |
| rs855791 (A-allele) | *TMPRSS6* | 0.44 | 0.36 | 0.45 | 0.43 | 0.42 |
| rs911752 (G-allele) | *BMP6* | 0.43 | 0.47 | 0.43 | 0.46 | 0.45 |
| rs9379137 (G-allele) | *BMP6* | 0.39 | 0.31 | 0.38 | 0.36 | 0.36 |
| rs968567 (A-allele) | *FADS2* | 0.15 | 0.10 | 0.16 | 0.16 | 0.14 |
| rs9859260 (G-allele) | *TFRC* | 0.44 | 0.45 | 0.38 | 0.41 | 0.43 |

Aryl hydrocarbon receptor nuclear translocator-like protein 1, ARNTL; solute carrier family 40, SLC40A1; transmembrane serine protease 6, TMPRSS6; transferrin receptor 1, TFRC; testis-expressed gene 14, TEX14; N-Acetyltransferase 2, NAT2; bone morphogenetic protein 6, BMP6; fatty acid desaturase 2, FADS2; homeostatic iron regulator, HFE; transferrin, TF; solute carrier family 39 member 14, SLC39A14; transferrin receptor 2, TFR2.

Chromosomal and gene position for the SNPs are stated in Supplementary Table 1.

Bold letters indicate exclusion of SNPs from our analyses due to MAF levels below the 4% threshold.

**Supplementary Table 7:**

Association between energy-adjusted iron intake and risk of persistent islet autoantibodies and childhood type 1 diabetes when excluding/censoring TGA+ subjects’ data at and after the development of TGA (i.e., censored all TGA+ subjects at the time of the first sample with TGA+).

|  |  |  |  |
| --- | --- | --- | --- |
| Outcome | Variable | Adjusted HR (95%CI) | P-value |
|  |  |  |  |
|  |  |  |  |
| IA | Iron intake (per mg/day) | 1.01 (0.99; 1.03)1 | 0.51 |
|  |  |  |  |
| GADA-first | Iron intake (per mg/day) | 1.02 (0.99; 1.05)1 | 0.13 |
|  |  |  |  |
| IAA-first | Iron intake (per mg/day) | 1.00 (0.97; 1.04)1 | 0.93 |
|  |  |  |  |
| Progression to T1D | Iron intake (per mg/day) | 0.99 (0.96; 1.03)2 | 0.64 |
|  |  |  |  |
|  |  |  |  |
| IA | Low iron intake3 | 1.10 (0.89; 1.36)1 | 0.39 |
|  | High iron intake | 1.18 (0.96; 1.44) | 0.11 |
|  |  |  |  |
| GADA-first | Low iron intake | 1.37 (0.99; 1.89)1 | 0.06 |
|  | High iron intake | **1.47 (1.08; 2.01)** | **0.02** |
|  |  |  |  |
| IAA-first | Low iron intake | 1.00 (0.72; 1.40)1 | 0.99 |
|  | High iron intake | 1.19 (0.88; 1.62) | 0.26 |
|  |  |  |  |
| Progression to T1D | Low iron intake | 1.04 (0.76; 1.43)2 | 0.79 |
|  | High iron intake | 1.17 (0.86; 1.58) | 0.32 |
|  |  |  |  |

Hazard ratio, HR; islet-autoimmunity, IA; insulin autoantibodies as first appearing persistent autoantibody, IAA-first; glutamic acid decarboxylase autoantibodies as first appearing autoantibody, GADA-first; childhood type 1 diabetes, T1D.

1 Covariates included in the model: sex, HLA-genotype, country, first-degree relative with T1D, and principal components 1 and 2.

2 Covariates included in the model: sex, HLA-genotype, country, first-degree relative with T1D, principal components 1 and 2, age at seroconversion and type of first appearing autoantibody.

3 Reference is the medium intake group (50% of iron intake values between the low and high group)

*Bold letters indicate significance at a threshold of 5% level.

**Supplementary Table 8:**

Association between energy-adjusted iron intake and risk of persistent islet autoantibodies stratified on genetic risk score for elevated circulating iron, ferritin, and transferrin saturation when excluding/censoring TGA+ subjects’ data at and after the development of TGA (i.e., censored all TGA+ subjects at the time of the first sample with TGA+).

|  |  |  |  |  |
| --- | --- | --- | --- | --- |
| Outcome | Energy-adjusted iron intake | Genetic risk score | Adjusted HR (95%CI) | P-value |
|  |  |  |  |  |
|  |  |  |  |  |
| IA | Low iron intake | 0 risk alleles | 1.61 (0.89; 2.90)1 | 0.11 |
|  |  | 1 risk alleles | 0.95 (0.67; 1.36) | 0.79 |
|  |  | ≥ 2 risk alleles | 1.14 (0.84; 1.55) | 0.39 |
|  |  |  |  |  |
|  | High iron intake | 0 risk alleles | 1.00 (0.52; 1.90) | 0.99 |
|  |  | 1 risk alleles | 0.94 (0.67; 1.33) | 0.74 |
|  |  | ≥ 2 risk alleles | **1.43 (1.08; 1.89)** | **0.01** |
|  |  |  |  |  |
| IAA-first | Low iron intake | 0 risk alleles | 2.24 (0.90; 5.57)1 | 0.08 |
|  |  | 1 risk alleles | 1.13 (0.68; 1.87) | 0.64 |
|  |  | ≥ 2 risk alleles | 0.78 (0.46; 1.34) | 0.37 |
|  |  |  |  |  |
|  | High iron intake | 0 risk alleles | 1.18 (0.42; 3.32) | 0.75 |
|  |  | 1 risk alleles | 0.73 (0.42; 1.27) | 0.27 |
|  |  | ≥ 2 risk alleles | **1.72 (1.13; 2.60)** | **0.01** |
|  |  |  |  |  |
| GADA-first | Low iron intake | 0 risk alleles | 1.74 (0.62; 4.89)1 | 0.30 |
|  |  | 1 risk alleles | 1.14 (0.65; 2.00) | 0.64 |
|  |  | ≥ 2 risk alleles | 1.48 (0.95; 2.30) | 0.09 |
|  |  |  |  |  |
|  | High iron intake | 0 risk alleles | 1.88 (0.72; 4.91) | 0.20 |
|  |  | 1 risk alleles | 1.43 (0.86; 2.38) | 0.17 |
|  |  | ≥ 2 risk alleles | 1.37 (0.88; 2.14) | 0.17 |
|  |  |  |  |  |

Hazard ratio, HR; islet-autoimmunity, IA; insulin autoantibodies as first appearing persistent autoantibody, IAA-first; glutamic acid decarboxylase autoantibodies as first appearing autoantibody, GADA-first. The genetic risk score was based on the following risk alleles: HFE (rs1800562-A allele) + HFE (rs1799945-G allele) + TMPRSS6 (rs855791-G allele).

1 Covariates included in the model: sex, HLA-genotype, country, first-degree relative with T1D, and principal components 1 and 2. HR for low and high iron status were estimated from the same model compared to the medium intake group (50% of iron intake values between the low and high group) and stratified by the number of risk alleles.

*Bold letters indicate significance at a threshold of 5% level.

**Supplementary Table 9:**

Stratified analyses by the number of risk alleles for single nucleotide polymorphisms (SNPs) that modified the association of energy-adjusted iron intake with the risk of persistent islet autoantibodies and childhood type 1 diabetes when excluding/censoring TGA+ subjects’ data at and after the development of TGA (i.e., censored all TGA+ subjects at the time of the first sample with TGA+).

|  |  |  |  |  |
| --- | --- | --- | --- | --- |
| Outcome | Iron intake | rs855791_G | Adjusted HR (95%CI) | P-value |
|  |  |  |  |  |
| IAA-first | Low iron intake1 | 0 risk alleles | 1.86 (0.89; 3.87)2 | 0.10 |
|  |  | 1 risk alleles | 1.18 (0.74; 1.87) | 0.49 |
|  |  | 2 risk alleles | 0.51 (0.25; 1.08) | 0.08 |
|  |  |  |  |  |
|  | High iron intake | 0 risk alleles | 0.71 (0.27; 1.81) | 0.47 |
|  |  | 1 risk alleles | 1.01 (0.63; 1.60) | 0.98 |
|  |  | 2 risk alleles | **1.78 (1.10; 2.88)** | **0.02** |
|  |  |  |  |  |
|  |  |  |  |  |
|  |  | rs11568351_C | Adjusted HR (95%CI) | P-value |
|  |  |  |  |  |
| Progression to T1D | Low iron intake | 0 risk alleles | 0.75 (0.50; 1.14)3 | 0.18 |
|  |  | 1 risk alleles | 1.50 (0.85; 2.67) | 0.16 |
|  |  | 2 risk alleles | 3.05 (0.35; 26.67) | 0.31 |
|  |  |  |  |  |
|  | High iron intake | 0 risk alleles | 0.69 (0.46; 1.03) | 0.07 |
|  |  | 1 risk alleles | **2.20 (1.27; 3.79)** | **0.01** |
|  |  | 2 risk alleles | **8.93 (1.58; 50.49)** | **0.01** |

Hazard ratio, HR; insulin autoantibodies as first appearing persistent autoantibody, IAA-first; childhood type 1 diabetes, T1D.

1 Reference is the medium intake group (50% of iron intake values between the low and high group)

2 Covariates included in the model: sex, HLA-genotype, country, first-degree relative with T1D, and principal components 1 and 2. HR for low and high iron status were estimated from the same model compared to the medium intake group (50% of iron intake values between the low and high group) and stratified by the number of risk alleles.

3 Covariates were included in the model: sex, HLA-genotype, country, first-degree relative with T1D, principal components 1 and 2, age at seroconversion, and type of first appearing autoantibody. HR for low and high iron status were estimated from the same model compared to the medium intake group (50% of iron intake values between the low and high group) and stratified by the number of risk alleles.

*Bold letters indicate significance at a threshold of 5% level.

**References**

1. Joslowski G, Yang J, Aronsson CA, Ahonen S, Butterworth M, Rautanen J, et al. Development of a harmonized food grouping system for between-country comparisons in the TEDDY Study. J Food Compos Anal Off Publ U N Univ Int Netw Food Data Syst. 2017 Oct;63:79–88.

2. Uusitalo U, Kronberg-Kippila C, Aronsson CA, Schakel S, Schoen S, Mattisson I, et al. Food composition database harmonization for between-country comparisons of nutrient data in the TEDDY Study. J Food Compos Anal Off Publ U N Univ Int Netw Food Data Syst. 2011 Jun;24(4–5):494–505.

3. Bonifacio E, Yu L, Williams AK, Eisenbarth GS, Bingley PJ, Marcovina SM, et al. Harmonization of glutamic acid decarboxylase and islet antigen-2 autoantibody assays for national institute of diabetes and digestive and kidney diseases consortia. J Clin Endocrinol Metab. 2010 Jul;95(7):3360–7.

4. Vehik K, Bonifacio E, Lernmark Å, Yu L, Williams A, Schatz D, et al. Hierarchical Order of Distinct Autoantibody Spreading and Progression to Type 1 Diabetes in the TEDDY Study. Diabetes Care. 2020 Sep;43(9):2066–73.

5. Benyamin B, Esko T, Ried JS, Radhakrishnan A, Vermeulen SH, Traglia M, et al. Novel loci affecting iron homeostasis and their effects in individuals at risk for hemochromatosis. Nat Commun. 2014 Oct 29;5:4926.

6. Therneau TM, Grambsch PM. Modeling Survival Data: Extending the Cox Model [Internet]. New York: Springer-Verlag; 2000 [cited 2020 Nov 30]. (Statistics for Biology and Health). Available from: https://www.springer.com/gp/book/9780387987842

7. Cook JD, Reddy MB. Effect of ascorbic acid intake on nonheme-iron absorption from a complete diet. Am J Clin Nutr. 2001 Jan 1;73(1):93–8.

8. Price AL, Patterson NJ, Plenge RM, Weinblatt ME, Shadick NA, Reich D. Principal components analysis corrects for stratification in genome-wide association studies. Nat Genet. 2006 Aug;38(8):904–9.

9. Storey JD. The positive false discovery rate: a Bayesian interpretation and the q-value. Ann Stat. 2003 Dec;31(6):2013–35.

10. Onengut-Gumuscu S, Chen WM, Burren O, Cooper NJ, Quinlan AR, Mychaleckyj JC, et al. Fine mapping of type 1 diabetes susceptibility loci and evidence for colocalization of causal variants with lymphoid gene enhancers. Nat Genet. 2015 Apr;47(4):381–6.
